# Supplementary material for: Doxycycline reverses epithelial-to-mesenchymal transition and suppresses the proliferation and metastasis of lung cancer cells
Source: PubMed Central journal article supplement (PMC4747360; doi:10.18632/oncotarget.5842), 2015-10-14
Supplement: oncotarget-06-40667-s001.pdf [file oncotarget-06-40667-s001.pdf]

SUPPLEMENTARY FIGURE AND TABLES

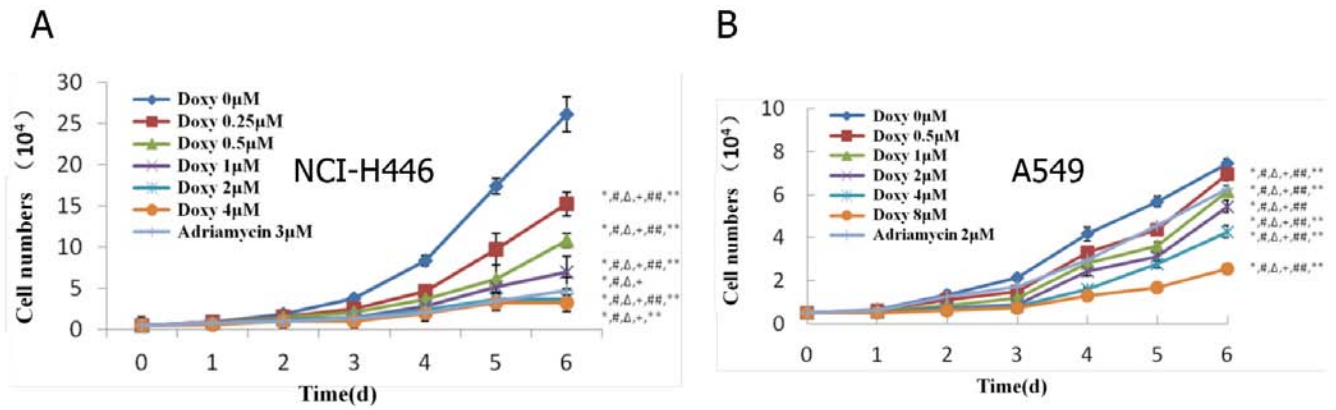

Supplementary Figure S1: The cell growth curves of NCI-H446 and A549 treated with indicated concentration of doxycycline and adriamycin. **A.** The doubling time of NCI-H446 in the first group (Doxy 0 μM) was 13.81 h. **B.** The doubling time of A549 in the first group (Doxy 0 μM) was 41.17 h.

**Supplementary Table S1: Molecular and biological function of RPLs**

| RPLs   | Molecular and biological function                                                                                       |
|--------|-------------------------------------------------------------------------------------------------------------------------|
| RPL10A | poly(A) RNA binding, anatomical structure morphogenesis, cellular protein metabolic process, gene expression [1, 2]     |
| RPL12  | poly(A) RNA binding, cellular protein metabolic process [3]                                                             |
| RPL13  | poly(A) RNA binding, RNA binding, cellular protein metabolic process [1, 4]                                             |
| RPL23A | nucleotide binding, poly(A) RNA binding, rRNA binding, cell proliferation, cellular protein metabolic process [1, 3, 5] |
| RPL38  | RNA binding, 90S pre-ribosome assembly, axial mesoderm development [6]                                                  |
| RPL3   | poly(A) RNA binding, RNA binding, cellular protein metabolic process [1, 7]                                             |

1. Castello, A., et al., *Insights into RNA biology from an atlas of mammalian mRNA-binding proteins*. Cell, 2012. 149(6): p. 1393–406.
2. Fiscaro, N., et al., *Identification of genes downregulated in the thymus by cyclosporin-A: preliminary characterization of clone CSA-19*. Mol Immunol, 1995. 32: p. 565–72.
3. Baltz, A.G., et al., *The mRNA-bound proteome and its global occupancy profile on protein-coding transcripts*. Mol Cell, 2012. 46: p. 674–90.
4. Kenmochi, N., et al., *A map of 75 human ribosomal protein genes*. Genome Res, 1998. 8(5): p. 509–23.
5. Jiang, H., et al., *Suppression of human ribosomal protein L23A expression during cell growth inhibition by interferon-beta*. Oncogene, 1997. 14: p. 473–80.
6. Espinosa, L., et al., *Primary sequence of the human, lysine-rich, ribosomal protein RPL38 and detection of an unusual RPL38 processed pseudogene in the promoter region of the type-1 angiotensin II receptor gene*. Biochim Biophys Acta, 1997. 1354: p. 58–64.
7. Ou, J.H., et al., *Cloning and characterization of a human ribosomal protein gene with enhanced expression in fetal and neoplastic cells*. Nucleic Acids Res, 1987. 15(21): p. 8919–34.

**Supplementary Table S2: Overview of the cell lines**

| Cell lines | Source       | Growth Properties | Morphology | Propagation                                             |      |                               | Subculturing                                                                                                                                                                                                                                                                                                                                                                                                          | Preservation                                                     |                                      |
|------------|--------------|-------------------|------------|---------------------------------------------------------|------|-------------------------------|-----------------------------------------------------------------------------------------------------------------------------------------------------------------------------------------------------------------------------------------------------------------------------------------------------------------------------------------------------------------------------------------------------------------------|------------------------------------------------------------------|--------------------------------------|
|            |              |                   |            | Medium                                                  | T    | Atmosphere                    |                                                                                                                                                                                                                                                                                                                                                                                                                       |                                                                  |                                      |
| NCI-H446   | lung cancer  | adherent          | epithelial | RPMI1640+10%FBS                                         | 37°C | 95% air<br>5% CO <sub>2</sub> | remove medium<br>rinse with 0.25%<br>trypsin, 0.03%<br>EDTA solution<br>remove the<br>solution and add an<br>additional 1 to 2 ml<br>of trypsin-EDTA<br>solution<br>allow the flask to sit<br>at room temperature<br>until the cells<br>detach<br>add fresh culture<br>medium, aspirate<br>and dispense into<br>new culture flasks<br>Subcultivation<br>ratio: 1:3 to 1:5<br>Medium renewal: 2<br>to 3 times per week | Complete<br>growth<br>medium<br>supplemented<br>with 10%<br>DMSO | liquid<br>nitrogen<br>vapor<br>phase |
| A549       | lung cancer  | adherent          | epithelial | RPMI1640+10%FBS                                         |      |                               |                                                                                                                                                                                                                                                                                                                                                                                                                       |                                                                  |                                      |
| PLC        | liver cancer | adherent          | epithelial | RPMI1640+10%FBS                                         |      |                               |                                                                                                                                                                                                                                                                                                                                                                                                                       |                                                                  |                                      |
| SMMC-7721  | liver cancer | adherent          | epithelial | RPMI1640+10%FBS                                         |      |                               |                                                                                                                                                                                                                                                                                                                                                                                                                       |                                                                  |                                      |
| HepG-2     | liver cancer | adherent          | epithelial | DMEM (high<br>glucose)+10%FBS+1%<br>non-essential amino |      |                               |                                                                                                                                                                                                                                                                                                                                                                                                                       |                                                                  |                                      |
| MHCC97H    | liver cancer | adherent          | epithelial | DMEM (high<br>glucose)+10%FBS                           |      |                               |                                                                                                                                                                                                                                                                                                                                                                                                                       |                                                                  |                                      |
| MHCC97L    | liver cancer | adherent          | epithelial | DMEM (high<br>glucose)+10%FBS                           |      |                               |                                                                                                                                                                                                                                                                                                                                                                                                                       |                                                                  |                                      |
| LOVO       | colon cancer | adherent          | epithelial | DMEM (high<br>glucose)+10%FBS                           |      |                               |                                                                                                                                                                                                                                                                                                                                                                                                                       |                                                                  |                                      |

(Continued)

| Cell lines        | Source          | Growth Properties        | Morphology        | Propagation                               |          | Subculturing                                                                                                                                                                                                                                                                                                                                                                | Preservation                                      |
|-------------------|-----------------|--------------------------|-------------------|-------------------------------------------|----------|-----------------------------------------------------------------------------------------------------------------------------------------------------------------------------------------------------------------------------------------------------------------------------------------------------------------------------------------------------------------------------|---------------------------------------------------|
|                   |                 |                          |                   | Medium                                    | T        |                                                                                                                                                                                                                                                                                                                                                                             |                                                   |
| PC-3              | prostate cancer | adherent                 | epithelial        | F12K+10%FBS                               |          |                                                                                                                                                                                                                                                                                                                                                                             |                                                   |
| A875              | melanoma        | adherent                 | epithelial        | DMEM (high glucose)+10%FBS                |          |                                                                                                                                                                                                                                                                                                                                                                             |                                                   |
| A375              | melanoma        | adherent                 | epithelial        | DMEM (high glucose)+10%FBS                |          |                                                                                                                                                                                                                                                                                                                                                                             |                                                   |
| Mum2B             | melanoma        | adherent                 | epithelial        | RPMI1640+10%FBS                           |          |                                                                                                                                                                                                                                                                                                                                                                             |                                                   |
| Mum2C             | melanoma        | adherent                 | epithelial        | RPMI1640+10%FBS                           |          |                                                                                                                                                                                                                                                                                                                                                                             |                                                   |
| <b>Cell lines</b> | <b>Source</b>   | <b>Growth Properties</b> | <b>Morphology</b> | <b>Propagation</b>                        |          | <b>Subculturing</b>                                                                                                                                                                                                                                                                                                                                                         | <b>Preservation</b>                               |
|                   |                 |                          |                   | <b>Medium</b>                             | <b>T</b> | <b>Atmosphere</b>                                                                                                                                                                                                                                                                                                                                                           | <b>Medium</b>                                     |
| MCF-7             | breast cancer   | adherent                 | epithelial        | RPMI1640+10%FBS+0.01 mg/ml bovine insulin | 37°C     | 95% air5% CO <sub>2</sub>                                                                                                                                                                                                                                                                                                                                                   | Complete growth medium supplemented with 10% DMSO |
|                   |                 |                          |                   |                                           |          | remove medium<br>rinse with 0.25% trypsin, 0.03% EDTA solution<br>remove the solution and add an additional 1 to 2 ml of trypsin-EDTA solution<br>allow the flask to sit at room temperature until the cells detach<br>add fresh culture medium, aspirate and dispense into new culture flasks<br>Subcultivation ratio: 1:3 to 1:5<br>Medium renewal: 2 to 3 times per week | liquid nitrogen vapor phase                       |

(Continued)

| Cell lines | Source            | Growth Properties       | Morphology   | Propagation                |   | Subculturing                                                                                                                             | Preservation |
|------------|-------------------|-------------------------|--------------|----------------------------|---|------------------------------------------------------------------------------------------------------------------------------------------|--------------|
|            |                   |                         |              | Medium                     | T |                                                                                                                                          |              |
| MDA-MB-231 | breast cancer     | adherent                | epithelial   | DMEM (high glucose)+10%FBS |   |                                                                                                                                          |              |
| SGC-7901   | stomach cancer    | adherent                | epithelial   | RPMI1640+10%FBS            |   |                                                                                                                                          |              |
| PANC-1     | pancreatic cancer | adherent                | epithelial   | DMEM (high glucose)+10%FBS |   |                                                                                                                                          |              |
| ASPC-1     | pancreatic cancer | adherent                | epithelial   | DMEM (high glucose)+10%FBS |   |                                                                                                                                          |              |
| HeLa       | cervical cancer   | adherent                | epithelial   | DMEM (high glucose)+10%FBS |   |                                                                                                                                          |              |
| SH-SY5Y    | Neuroblastoma     | adherent and suspension | epithelial   | RPMI1640+10%FBS            |   |                                                                                                                                          |              |
| K562       | leukemia          | suspension              | lymphoblast  | RPMI1640+10%FBS            |   | Start new cultures at 1 * 10 <sup>5</sup> viable cells/ml. Subculture at 1 * 10 <sup>6</sup> cells/ml. Medium renewal: Every 2 to 3 days |              |
| HL60       | leukemia          | suspension              | myeloblastic | RPMI1640+10%FBS            |   |                                                                                                                                          |              |

**Supplementary Table S3: Twist1, Twist2, SNAI1, SNAI2 promoter reporter clones**

| Promoter reporter clones | Promoter sequence                         | Vector information |
|--------------------------|-------------------------------------------|--------------------|
| Twist1*                  | Promoter Length: 1282 bp                  | pEZX-PG04          |
|                          | Sequence length upstream of TSS: 1043 bp  |                    |
|                          | Sequence length downstream of TSS: 238 bp |                    |
| Twist2*                  | Promoter Length: 1512 bp                  |                    |
|                          | Sequence length upstream of TSS: 1416 bp  |                    |
|                          | Sequence length downstream of TSS: 95 bp  |                    |
| SNAI1*                   | Promoter Length: 1255 bp                  |                    |
|                          | Sequence length upstream of TSS: 1185 bp  |                    |
|                          | Sequence length downstream of TSS: 69 bp  |                    |
| SNAI2*                   | Promoter Length: 1399 bp                  |                    |
|                          | Sequence length upstream of TSS: 1235 bp  |                    |
|                          | Sequence length downstream of TSS: 163 bp |                    |

\*The promoter reporter clones were purchased from GeneCopoeia (Guangzhou, China)

**Supplementary Table S4: AP-1, STAT3, NF- $\kappa$ B luciferase reporter gene vector**

| Reporter gene vector   | Response element                                                                                | Vector information |
|------------------------|-------------------------------------------------------------------------------------------------|--------------------|
| pAP1-TA-luc*           | AP1 response element 26–67<br>TGACTAATGACTAATGACTAATGACTAATGACTAATGACTAA                        | pGL6-TA            |
| pSTAT3-TA-luc*         | STAT3 response element 32–86<br>TGCTTCCCG AACGTTGCTT CCCGAACGTT GCTTCCCGAA<br>CGTTGCTTCC GAACGT | pGL6-TA            |
| pNF $\kappa$ B-TA-luc* | NF $\kappa$ B response element 26–65<br>GGGAATTTCCGGGAATTTCCGGGAATTTCCGGGAATTTCC                | pGL6-TA            |
| pRL-TK <sup>#</sup>    | HSV-TK promoter 7–759                                                                           | pRL                |

\*The reporter gene vector were purchased from Beyotime Biotechnology (Shanghai, China)

<sup>#</sup>The reporter gene vector was purchased from Promega
